# Supplementary material for: Combating the COVID-19 pandemic in a resource-constrained setting: insights from initial response in India
Source: HighWire-hosted journal article supplement (doi:10.1136/bmjgh-2020-003416), 2020-11-01

Supplementary Figure 1A. 7-day moving averages of number of active COVID-19 cases per million population in high burden states and union territories in India

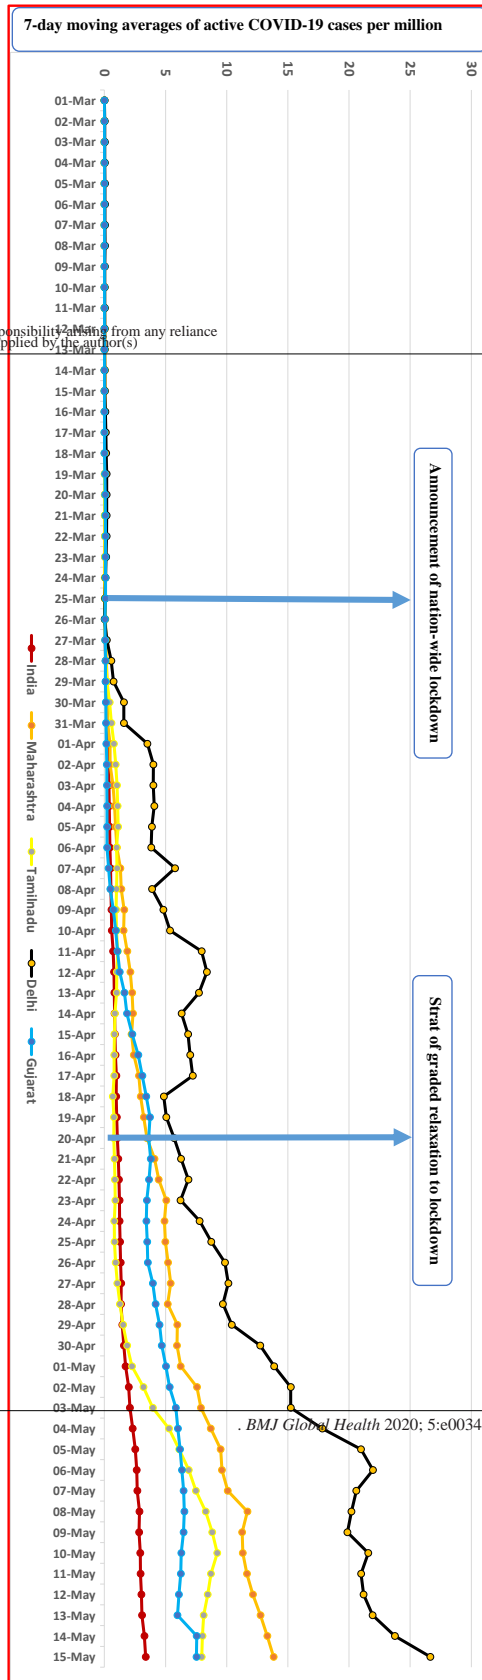

Supplementary Figure 1B. 7-day moving averages of number of active COVID-19 cases in high burden states and union territories in India

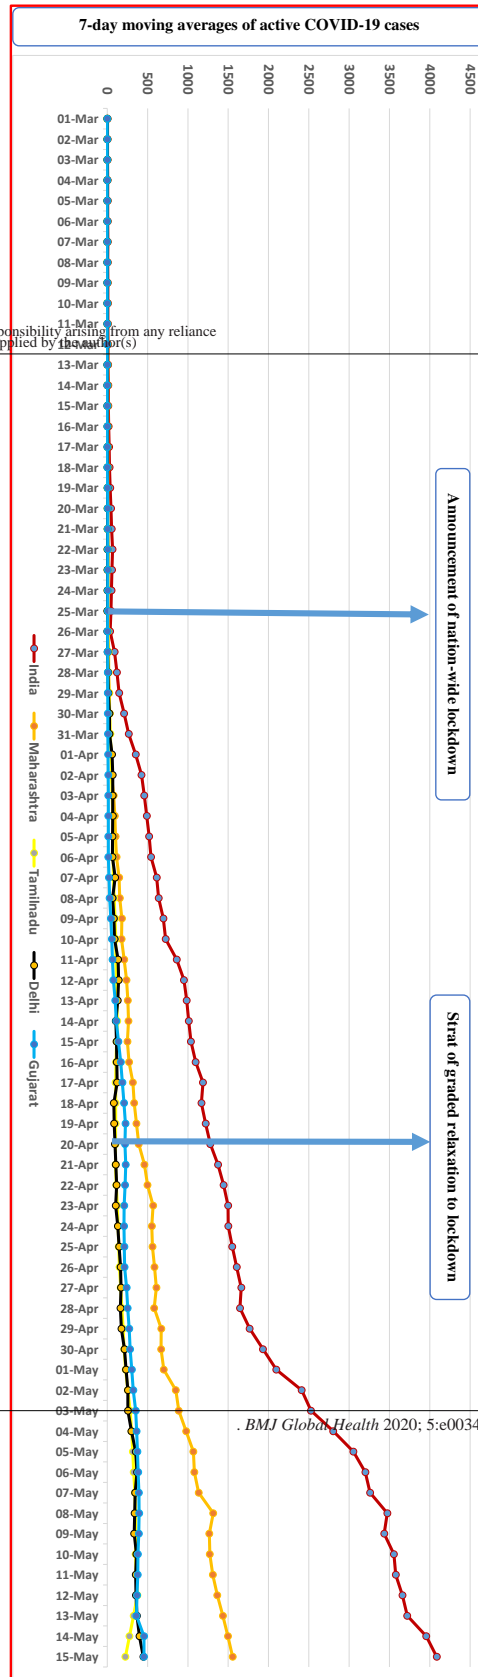

Supplement: bmjgh-2020-003416supp001_data_supplement.pdf [file bmjgh-2020-003416supp001_data_supplement.pdf]
